# Supplementary material for: Enhancing cell-scale performance via sustained release of the varicella-zoster virus antigen from a microneedle patch under simulated microgravity
Source: Royal Society of Chemistry journal article supplement (doi:10.1039/d3bm01440a), 2023-12-12
Supplement: d3bm01440a1.pdf [file d3bm01440a1.pdf]

Electronic Supplementary Information (ESI) for Biomaterials Science

## **Enhancing cell-scale performance via sustained release of varicella-zoster virus antigen from microneedle patch under simulated microgravity**

Yue Yin<sup>a,1</sup>, Junyuan Yang<sup>a,1</sup>, Ge Gao<sup>a</sup>, Huaijuan Zhou<sup>c</sup>, Bowen Chi<sup>d</sup>, Hong Yu Yang<sup>b\*</sup>, Jinhua Li<sup>a\*</sup>, Yilong Wang<sup>a,d\*</sup>

<sup>a</sup> School of Medical Technology, Beijing Institute of Technology, Beijing 100081, China

<sup>b</sup> College of Materials Science and Engineering, Jilin Institute of Chemical Technology, Jilin City 132022, Jilin Province, China

<sup>c</sup> Advanced Research Institute of Multidisciplinary Sciences, Beijing Institute of Technology, Beijing 100081, China

<sup>d</sup> Department of Neurology, Beijing Tiantan Hospital, Capital Medical University, Beijing 100070, China

<sup>1</sup> These authors contributed equally to this work.

### **\*Corresponding authors:**

Prof. Hongyu Yang, Ph.D.

E-mail: [yanghy@jlicet.edu.cn](mailto:yanghy@jlicet.edu.cn)

Prof. Jinhua Li, Ph.D.

E-mail: [lijinhua@bit.edu.cn](mailto:lijinhua@bit.edu.cn)

Prof. Yilong Wang, Ph.D.

E-mail: [yilongwang528@163.com](mailto:yilongwang528@163.com)

## Supplementary results

**Table S1. Dimension information on the mould that is used to fabricate microneedles.**

| Pyramid needle              |                                  |                                      | Groove       |                     |               |
|-----------------------------|----------------------------------|--------------------------------------|--------------|---------------------|---------------|
| Height<br>( $\mu\text{m}$ ) | Side length<br>( $\mu\text{m}$ ) | Center distance<br>( $\mu\text{m}$ ) | Needle array | Side length<br>(mm) | Depth<br>(mm) |
| 670                         | 300×300                          | 500                                  | 10×10        | 9.8×9.8             | 1.5           |

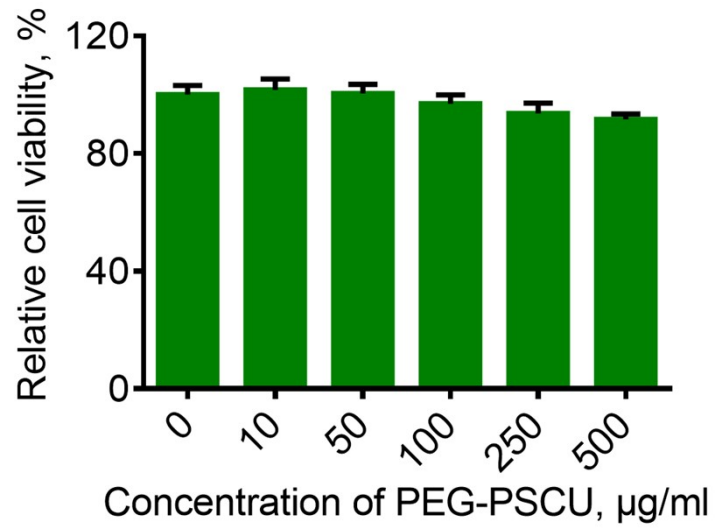

**Figure S1. Cytotoxic effects of the PEG-PSCU copolymer at gradient concentrations on dendritic cells *in vitro*. Error bars represent  $\pm$  SD (n = 3).**

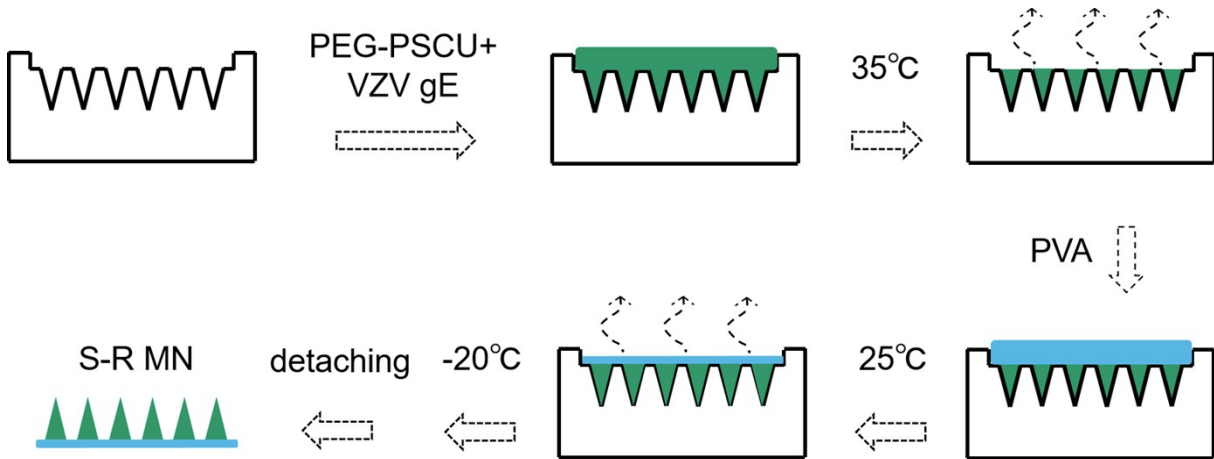

**Figure S2. The fabrication process of S-R MN encapsulated VZV gE.** The PDMS mold was used to fabricate S-R MN. Initially, 20 wt% of PEG-PSCU solution in pH 8.0 was uniformly mixed with the desired amount of VZV gE and carefully added into all micro-cavities. After removing the bubbles via vacuum evaporation, microneedles were dried at 35°C for at least 24 h. Thereafter, for the base layer, 15 wt% pure PVA solution was uniformly plated onto the dried needles. Bubbles in this PVA solution were removed via vacuum evaporation, and this base layer solution was dried at room temperature for an additional 12 h and at -20°C for an additional 12 h to construct a separable S-R MN that could be detached favorably.

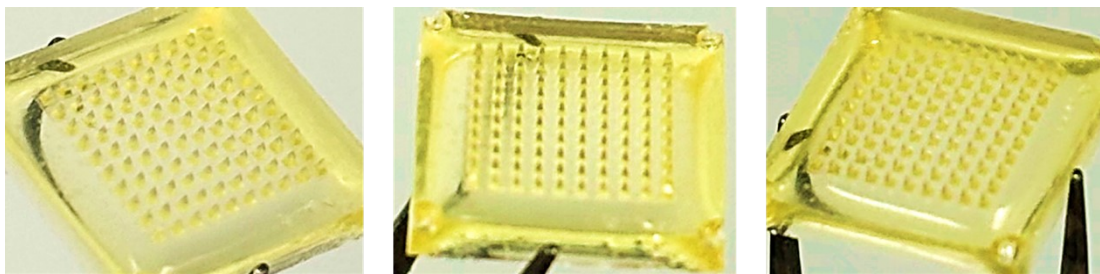

**Figure S3. Photographs of an entire original microneedle patch from different angles.**

**A**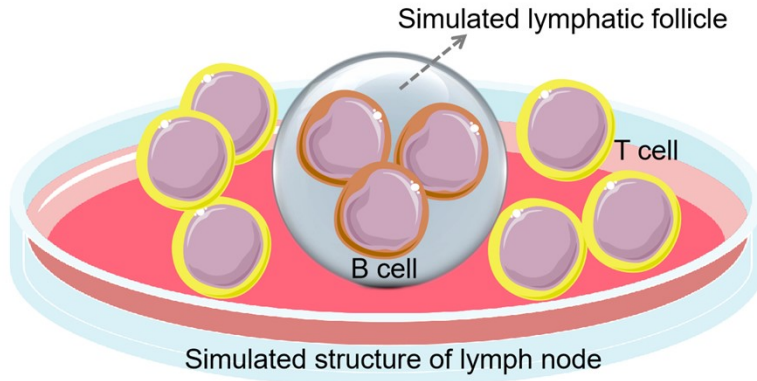**B**

| T cells/<br>Total cells (%) | CD4 <sup>+</sup> T cells/<br>Total T cells (%) | CD8 <sup>+</sup> T cells/<br>Total T cells (%) | B cells/<br>Total Simulated lymphatic<br>follicle cells (%) |
|-----------------------------|------------------------------------------------|------------------------------------------------|-------------------------------------------------------------|
| 58.7%±0.4%                  | 46.9%±2.1%                                     | 27.3%±2.3%                                     | 81.7±1.4%                                                   |

**C**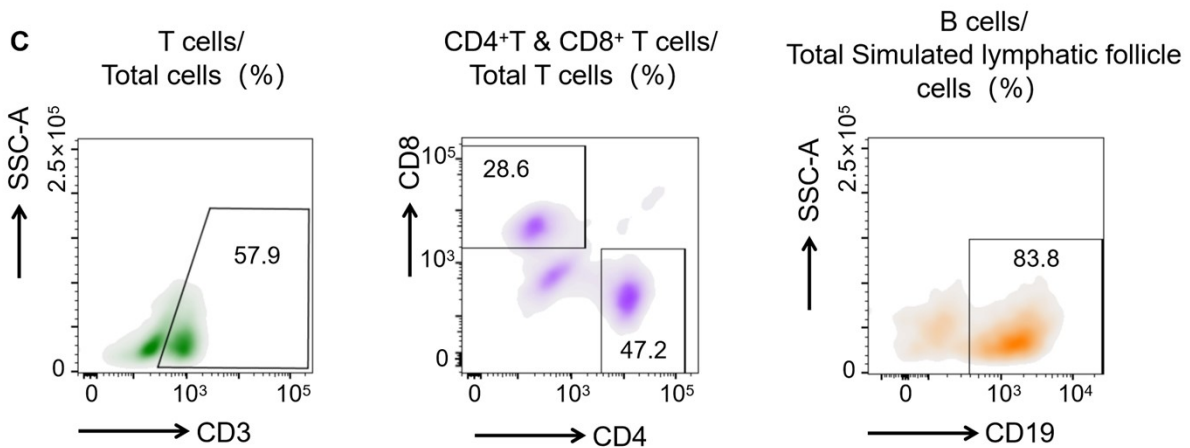

**Figure S4. Introduction of the *in vitro* lymph node model in this study.** (A) Schematic illustration of the main structure and cell composition of the *in vitro* lymph node model. (B) The percentage of various types of cells in the *in vitro* lymph node model and (C) representative diagrams of flow cytometry.

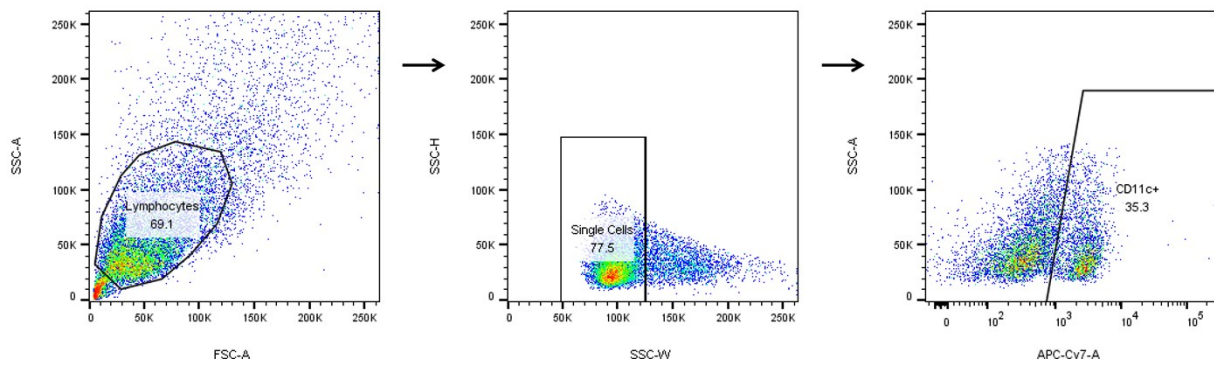

**Figure S5. The gating strategy for Figure 5B-G.**

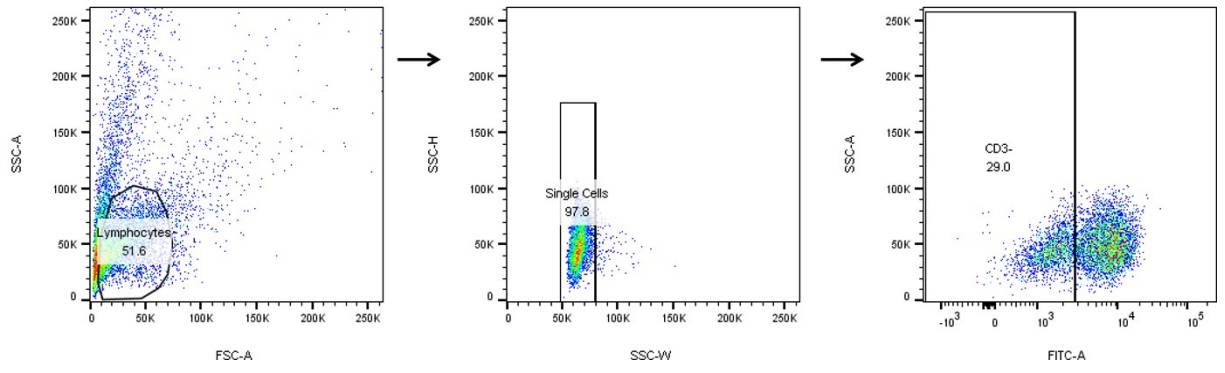

**Figure S6.** The gating strategy for Figure 5H-K.
